# Supplementary material for: Effects of Probiotics Supplementation on the Intestinal Metabolites, Muscle Fiber Properties, and Meat Quality of Sunit Lamb
Source: MDPI journal article supplement (doi:10.3390/ani13040762), 2023-02-20
Supplement: s1 [file s1]

## Supplementary Materials

**Table S1.** gDNA Eraser system.

| <b>Reagent</b>               | <b>Addition (μL)</b> |
|------------------------------|----------------------|
| RNase Free dH <sub>2</sub> O | 5.0                  |
| 5×gDNA Eraser Buffer         | 2.0                  |
| gDNA Eraser                  | 1.0                  |
| Total RNA (500 ng/μL)        | 2.0                  |
| Total                        | 10.0                 |

**Table S2.** Reverse transcription system

| <b>Reagent</b>                          | <b>Addition (μL)</b> |
|-----------------------------------------|----------------------|
| RNA obtained from the previous reaction | 10.0                 |
| RNase Free dH <sub>2</sub> O            | 4.0                  |
| 5×PrimeScript Buffer 2 (for Real Time)  | 4.0                  |
| RT Primer Mix                           | 1.0                  |
| PrimeScript RT Enzyme MIX I             | 1.0                  |
| Total                                   | 20.0                 |

**Table S3.** qPCR system

| <b>Reagent</b>                                   | <b>Addition (μL)</b> |
|--------------------------------------------------|----------------------|
| TB Green Premix Ex Taq II (Tli RNaseH Plus) (2×) | 12.5                 |
| RNase Free dH <sub>2</sub> O                     | 8.5                  |
| Primer F                                         | 1.0                  |
| Primer R                                         | 1.0                  |
| cDNA template (50 ng/ μL)                        | 2.0                  |
| Total                                            | 25.0                 |
